# Supplementary material for: An Effective Package of Antioxidants for Avoiding Premature Failure in Polypropylene Random Copolymer Plastic Pipes under Hydrostatic Pressure and High Temperature
Source: MDPI journal article supplement (doi:10.3390/polym13162825), 2021-08-22
Supplement: s1 [file s1]

*Supplementary Materials*

# **An effective package of antioxidants for avoiding premature failure in polypropylene random copolymers plastic pipes under hydrostatic pressure and high temperature**

**Enrique Blázquez-Blázquez<sup>1</sup>, Joaquín Lahoz<sup>2</sup>, Ernesto Pérez<sup>1</sup>, María L. Cerrada<sup>1\*</sup>**

<sup>1</sup>Instituto de Ciencia y Tecnología de Polímeros (ICTP-CSIC). Juan de la Cierva 3, 28006 Madrid, Spain.

<sup>2</sup>Centro de Ensayos, Innovación y Servicios, S.L. (CEIS). Cr. Villaviciosa de Odón a Móstoles (M-856) Km. 1.5, 28935 Móstoles, Spain.

E-mail address of corresponding author: [mlcerrada@ictp.csic.es](mailto:mlcerrada@ictp.csic.es)

**Table S1.** Specimens analyzed in the present research and a brief description.

| <b>Samples</b>          | <b>Description</b>                                                                                                    |
|-------------------------|-----------------------------------------------------------------------------------------------------------------------|
| P061new                 | original pipe                                                                                                         |
| P490new                 | original pipe                                                                                                         |
| P826new                 | original pipe                                                                                                         |
| P061aged <sup>IN</sup>  | interior part of pipe subjected to an accelerated aging test                                                          |
| P061aged <sup>OUT</sup> | outer part of pipe subjected to an accelerated aging test                                                             |
| P490aged <sup>IN</sup>  | interior part of pipe subjected to an accelerated aging test                                                          |
| P490aged <sup>OUT</sup> | outer part of pipe subjected to an accelerated aging test                                                             |
| P826aged <sup>IN</sup>  | interior part of pipe subjected to an accelerated aging test                                                          |
| P826aged <sup>OUT</sup> | outer part of pipe subjected to an accelerated aging test                                                             |
| F061Q                   | rapidly cooled Q film                                                                                                 |
| F061S                   | slowly cooled S film                                                                                                  |
| F490Q                   | rapidly cooled Q film                                                                                                 |
| F490S                   | slowly cooled S film                                                                                                  |
| F826Q                   | rapidly cooled Q film                                                                                                 |
| F826S                   | slowly cooled S film                                                                                                  |
| F061Q18A                | rapidly cooled Q film annealed at 110 °C as an attempt of reproducing the outer part (air) of an aged pipe            |
| F061S18A                | slowly cooled S film annealed at 110 °C as an attempt of reproducing the outer part (air) of an aged pipe             |
| F490Q18A                | rapidly cooled Q film annealed at 110 °C as an attempt of reproducing the outer part (air) of an aged pipe            |
| F490S18A                | slowly cooled S film annealed at 110 °C as an attempt of reproducing the outer part (air) of an aged pipe             |
| F826Q18A                | rapidly cooled Q film annealed at 110 °C as an attempt of reproducing the outer part (air) of an aged pipe            |
| F826S18A                | slowly cooled S film annealed at 110 °C as an attempt of reproducing the outer part (air) of an aged pipe             |
| F061Q18W                | rapidly cooled Q film immersed in water at 110 °C as an attempt of reproducing the inner part (water) of an aged pipe |
| F061S18W                | slowly cooled S film immersed in water at 110 °C as an attempt of reproducing the inner part (water) of an aged pipe  |
| F490Q18W                | rapidly cooled Q film immersed in water at 110 °C as an attempt of reproducing the inner part (water) of an aged pipe |
| F490S18W                | slowly cooled S film immersed in water at 110 °C as an attempt of reproducing the inner part (water) of an aged pipe  |
| F826Q18W                | rapidly cooled Q film immersed in water at 110 °C as an attempt of reproducing the inner part (water) of an aged pipe |
| F826S18W                | slowly cooled S film immersed in water at 110 °C as an attempt of reproducing the inner part (water) of an aged pipe  |

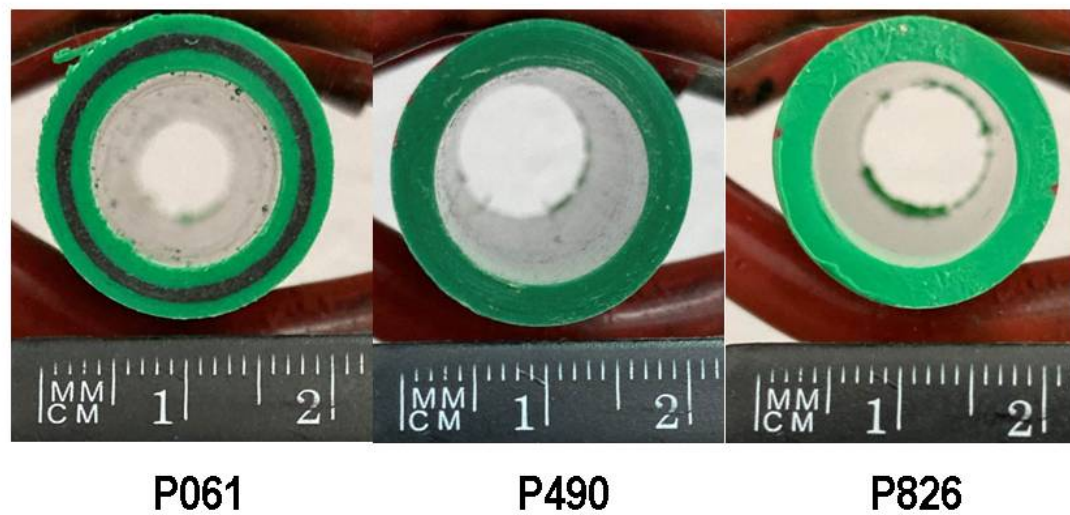

**Figure S1.** Transversal cut of each individual new PP-R pipe.

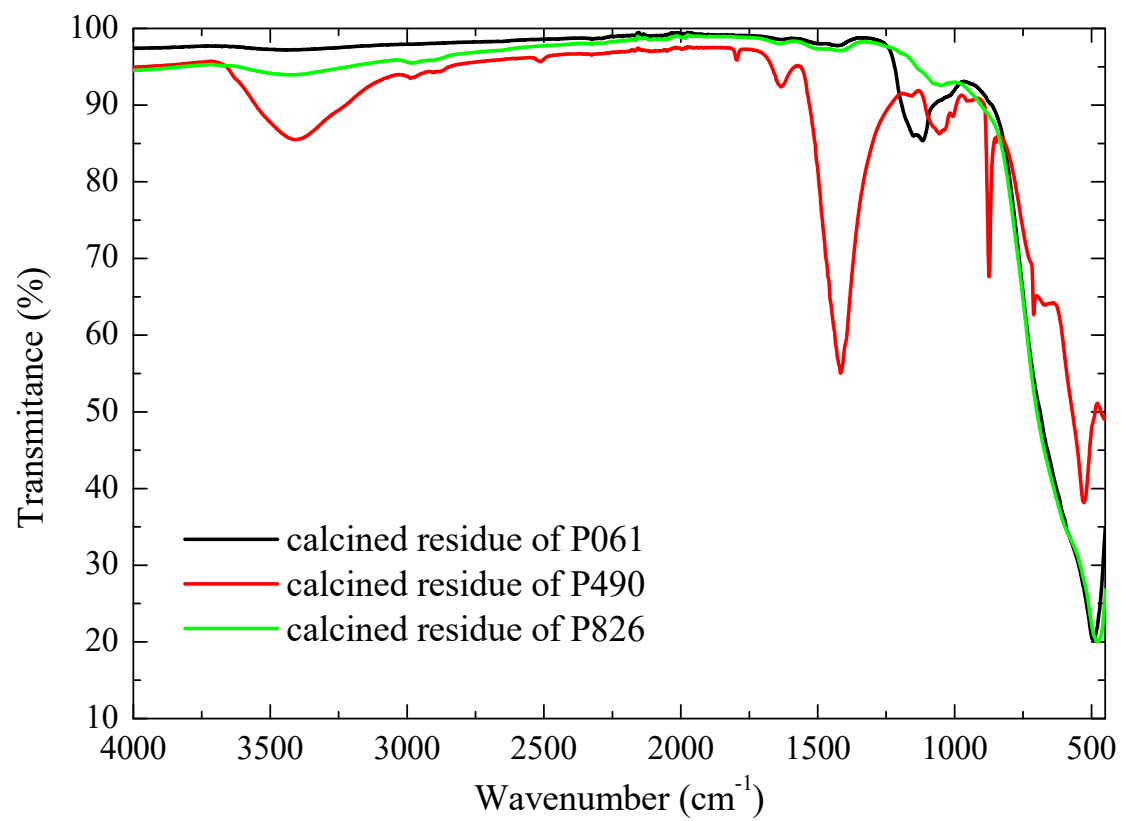

**Figure S2.** FTIR spectra of the obtained residues from the different pipes after their calcination.

Table S2. Data from SEM- EDX

| Pipe | El | Series   | norm. C<br>(wt. %) | error<br>(wt. %) |
|------|----|----------|--------------------|------------------|
| P061 | C  | K-series | 0.28               | 0.1              |
|      | O  | K-series | 46.53              | 5.6              |
|      | Na | K-series | 0.06               | 0.0              |
|      | Mg | K-series | 0.05               | 0.0              |
|      | Al | K-series | 1.07               | 0.1              |
|      | Si | K-series | 22.72              | 0.0              |
|      | Cl | K-series | 0.22               | 0.0              |
|      | Ti | K-series | 29.07              | 1.8              |
| P490 | C  | K-series | 3.02               | 0.6              |
|      | O  | K-series | 34.56              | 4.6              |
|      | Na | K-series | 0.00               | 0.0              |
|      | Mg | K-series | 0.29               | 0.0              |
|      | Al | K-series | 1.16               | 0.1              |
|      | Si | K-series | 0.31               | 0.0              |
|      | P  | K-series | 0.40               | 0.0              |
|      | Cl | K-series | 0.46               | 0.0              |
|      | Ca | K-series | 20.84              | 0.7              |
|      | Ti | K-series | 12.36              | 0.4              |
|      | Fe | K-series | 18.20              | 0.6              |
|      | Zn | K-series | 8.40               | 0.4              |
| P826 | C  | K-series | 1.71               | 0.6              |
|      | O  | K-series | 44.03              | 7.2              |
|      | Na | K-series | 0.30               | 0.1              |
|      | Mg | K-series | 0.13               | 0.0              |
|      | Al | K-series | 1.22               | 0.1              |
|      | Si | K-series | 0.31               | 0.0              |
|      | P  | K-series | 0.54               | 0.1              |
|      | S  | K-series | 0.17               | 0.0              |
|      | Cl | K-series | 0.28               | 0.0              |
|      | Ca | K-series | 1.11               | 0.1              |
|      | Ti | K-series | 49.82              | 1.5              |
|      | Cu | K-series | 0.38               | 0.0              |

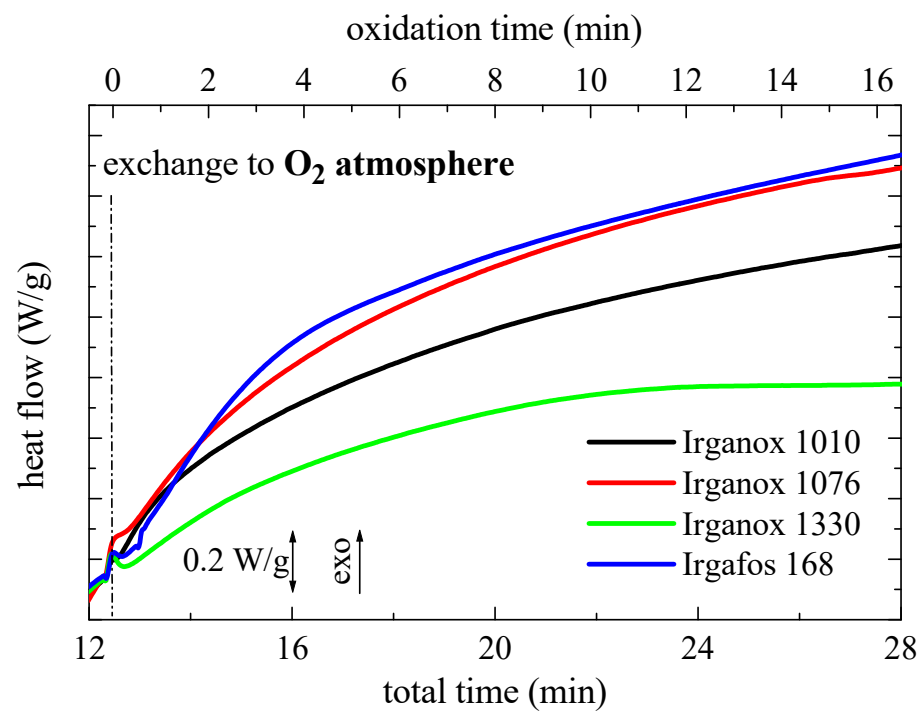

**Figure S3.** Thermo-oxidative behavior of different antioxidants under an oxidative atmosphere. The oxidation stage begins at 12.5 min.
